# Supplementary material
Source: Springer Nature journal article supplement (https://www.springermedizin.de/resource/supplementary/12936_2013_3139_MOESM2_ESM.pdf/9546260)
Supplement: MOESM2 [file 9546260]

## Additional File 2

**Table S2: Sensitivity of cost estimates to key assumptions (NOTE: all costs are economic costs from the societal perspective, presented in 2012 USD)**

|                                                                   | Brong Ahafo             |             |                                     |             | Central                 |             |                                     |             | Western                 |             |                                     |             |
|-------------------------------------------------------------------|-------------------------|-------------|-------------------------------------|-------------|-------------------------|-------------|-------------------------------------|-------------|-------------------------|-------------|-------------------------------------|-------------|
|                                                                   | Cost per LLIN delivered | % deviation | Cost per death averted <sup>1</sup> | % deviation | Cost per LLIN delivered | % deviation | Cost per death averted <sup>1</sup> | % deviation | Cost per LLIN delivered | % deviation | Cost per death averted <sup>1</sup> | % deviation |
| Base case                                                         | 2.42                    | -           | 5,026                               | -           | 3.35                    | -           | 7,499                               | -           | 3.06                    | -           | 8,702                               | -           |
| Useful lifespan of LLIN                                           |                         |             |                                     |             |                         |             |                                     |             |                         |             |                                     |             |
| 2 years                                                           | 3.55                    | 47%         | 7,381                               | 47%         | 4.90                    | 46%         | 10,972                              | 46%         | 4.50                    | 47%         | 12,807                              | 47%         |
| 5 years                                                           | 1.51                    | 38%         | 3,143                               | 37%         | 2.11                    | 37%         | 4,722                               | 37%         | 1.91                    | 38%         | 5,419                               | 38%         |
| Cost of LLIN                                                      |                         |             |                                     |             |                         |             |                                     |             |                         |             |                                     |             |
| USD 3.25                                                          | 2.35                    | 3%          | 4,895                               | 3%          | 2.69                    | 20%         | 6,022                               | 20%         | 2.40                    | 22%         | 6,830                               | 22%         |
| USD 4.80                                                          | 3.00                    | 24%         | 6,245                               | 24%         | 3.39                    | 1%          | 7,601                               | 1%          | 3.10                    | 1%          | 8,831                               | 1%          |
| No. child deaths averted per 1000 children sleeping under an LLIN |                         |             |                                     |             |                         |             |                                     |             |                         |             |                                     |             |
| 3.4 per 1000                                                      | 2.42                    | 0%          | 8,130                               | 62%         | 3.35                    | 0%          | 12,131                              | 62%         | 3.06                    | 0%          | 14,076                              | 62%         |
| 7.7 per 1000                                                      | 2.42                    | 0%          | 3,590                               | 29%         | 3.35                    | 0%          | 3,356                               | 55%         | 3.06                    | 0%          | 6,215                               | 29%         |
| Discount rate                                                     |                         |             |                                     |             |                         |             |                                     |             |                         |             |                                     |             |
| 0%                                                                | 2.28                    | 6%          | 4,742                               | 6%          | 3.16                    | 6%          | 7,083                               | 6%          | 2.89                    | 6%          | 8,210                               | 6%          |
| 10%                                                               | 2.74                    | 13%         | 5,708                               | 14%         | 3.80                    | 13%         | 8,502                               | 13%         | 3.48                    | 14%         | 9,885                               | 14%         |

<sup>1</sup>Additional all-cause child deaths averted by improvements in ITN use after the LLIN Campaign
